# Supplementary material for: Conflict, violence, and warfare among early farmers in Northwestern Europe
Source: PubMed Central journal article supplement (PMC9942812; doi:10.1073/pnas.2209481119), 2023-01-17
Supplement: pnas.2209481119.sapp.pdf [file pnas.2209481119.sapp.pdf]

## Supplementary Material

Sites listed on Map (Figure 4)

| No. | Site Name                     | Country     | Reference                            | Ref. No. |
|-----|-------------------------------|-------------|--------------------------------------|----------|
| 1   | Adlestrop                     | England     | Smith (2005)                         | 90       |
| 2   | Ajvide                        | Sweden      | Ahlström & Molnar (2012)             | 51       |
| 3   | Alba Iulia-Lumea Nouă         | Romania     | Gligor <i>et al.</i> (2018)          | 91       |
| 4   | Almieres, Saint Rome de Dolan | France      | Guilaine & Zammit (2001)             | 92       |
| 5   | Altendorf                     | Germany     | Fibiger (2012)                       | 19       |
| 6   | Altheim                       | Germany     | Petrasch (1999)                      | 93       |
| 7   | Aragon, Le Massegros          | France      | Guilaine & Zammit (2001)             | 92       |
| 8   | Ascott under Wychwood         | England     | Benson & Whittle (2006)              | 94       |
| 9   | Asparn-Schletz                | Austria     | Teschler-Nicola (2012)               | 64       |
| 10  | Ballyharry                    | Ireland     | Moore (2004)                         | 95       |
| 11  | Barleben                      | Germany     | Fibiger (2009)                       | 96       |
| 13  | Beilerstroom Valley           | Netherlands | v. d. Sanden & ter Schegget (2015)   | 97       |
| 14  | Belas Knap                    | England     | Schulting & Wysocki (2005)           | 23       |
| 15  | Bergheim                      | France      | Chenal <i>et al.</i> (2015)          | 98       |
| 16  | Bidstrup                      | Denmark     | Fibiger <i>et al.</i> (2013)         | 3        |
| 17  | Bòvila Madurell               | Spain       | Beyneix 2012                         | 99       |
| 18  | Boles Barrow                  | England     | Smith & Brickley (2009)              | 100      |
| 19  | Bolkilde I                    | Denmark     | Bennike <i>et al.</i> (1986)         | 101      |
| 20  | Borreby XIV                   | Denmark     | Fibiger <i>et al.</i> (2013)         | 3        |
| 21  | Bredelem                      | Germany     | Fibiger <i>et al.</i> (2013)         | 3        |
| 22  | Carn Brea                     | England     | Mercer (1999)                        | 46       |
| 23  | Castelnau-le-Lez              | France      | Guilaine & Zammit (2001)             | 92       |
| 24  | Clachaig, Isle of Arran       | Scotland    | Smith (2017)                         | 25       |
| 25  | Coizard                       | France      | Guilaine & Zammit (2001)             | 92       |
| 26  | Coldrum                       | England     | Schulting & Wysocki (2005)           | 23       |
| 27  | Crickley Hill                 | England     | Mercer (1999)                        | 46       |
| 29  | Cueva Honda                   | Spain       | Jimenez-Brobeil <i>et al.</i> (2009) | 102      |
| 30  | Dinnington                    | England     | Schulting & Wysocki (2005)           | 23       |
| 31  | Døringe I                     | Denmark     | Bennike (1985)                       | 103      |
| 32  | Dorsetshire Long Barrow       | England     | Schulting & Wysocki (2005)           | 23       |
| 33  | Dræby                         | Denmark     | Fibiger <i>et al.</i> (2013)         | 3        |
| 34  | Duggleby Howe                 | England     | Gibson & Ogden (2008)                | 104      |
| 35  | Ebberston                     | England     | Schulting & Wysocki (2005)           | 23       |
| 36  | Eichendorf                    | Germany     | Fibiger (2009)                       | 96       |
| 37  | Els Trocs                     | Spain       | Alt <i>et al.</i> (2020)             | 105      |
| 38  | Eulau                         | Germany     | Meyer <i>et al.</i> (2009)           | 37       |
| 39  | Fengate                       | England     | Pryor (1976)                         | 106      |
| 40  | Fontcagarelle                 | France      | Guilaine & Zammit (2001)             | 92       |
| 41  | Font-Rial                     | France      | Guilaine & Zammit (2001)             | 92       |
| 42  | Fussels Lodge                 | England     | Smith (2013)                         | 4        |
| 43  | Gammellung                    | Denmark     | Bennike (1985)                       | 103      |
| 44  | Ganløse                       | Denmark     | Fibiger <i>et al.</i> (2013)         | 3        |
| 45  | Gjerrild                      | Denmark     | Bennike (1985)                       | 103      |
| 46  | Goldberg                      | Germany     | Fibiger (2009)                       | 3        |
| 47  | Gross Upahl                   | Germany     | Lidke (2012)                         | 107      |
| 48  | Grydehoj II                   | Denmark     | Fibiger <i>et al.</i> (2013)         | 3        |
| 49  | Halberstadt                   | Germany     | Meyer <i>et al.</i> (2018)           | 39       |
| 50  | Hambledon Hill                | England     | Mercer & Healy (2008)                | 108      |
| 51  | Handschuhsheim                | Germany     | Wahl & Höhn (1988)                   | 109      |
| 52  | Hartlepool                    | England     | Schulting & Wysocki (2005)           | 23       |

|     |                                |                   |                                  |     |
|-----|--------------------------------|-------------------|----------------------------------|-----|
| 53  | Hauslabjoch (Ötzi)             | Austria           | Pernter <i>et al.</i> (2007)     | 110 |
| 54  | Hay Wood Cave                  | England           | Schulting (2012)                 | 111 |
| 55  | Hellekis                       | Sweden            | Retzius (1900)                   | 112 |
| 56  | Helman Tor                     | England           | Mercer (1999)                    | 46  |
| 57  | Hembury                        | England           | Mercer (1999)                    | 46  |
| 58  | Herxheim                       | Germany           | Orschiedt <i>et al.</i> (2003)   | 113 |
| 59  | Hildesheim                     | Germany           | Schutkowski <i>et al.</i> (1996) | 14  |
| 60  | Hulbjerg                       | Denmark           | Bennike (1985)                   | 103 |
| 61  | Hypogeum 1, Oyes               | France            | Guilaine & Zammit (2001)         | 92  |
| 62  | Hypogeum 2, Oyes               | France            | Guilaine & Zammit (2001)         | 92  |
| 63  | Hypogeum II, Villevénard       | France            | Guilaine & Zammit (2001)         | 92  |
| 64  | Ifton Quarry Cave              | England           | Schulting (2020)                 | 114 |
| 65  | Isbister                       | Scotland (Orkney) | Lawrence (2012)                  | 115 |
| 66  | Juelsberg                      | Denmark           | Fibiger <i>et al.</i> (2013)     | 3   |
| 67  | Karleby                        | Sweden            | Fibiger <i>et al.</i> (2013)     | 3   |
| 68  | Kelderød                       | Denmark           | Bennike (1985)                   | 103 |
| 69  | Kilgreany                      | Ireland           | Fibiger (2016)                   | 116 |
| 70  | Kitzen                         | Germany           | Fibiger (2009)                   | 96  |
| 71  | Knowe of Rowiegar              | Scotland (Orkney) | Smith & Brickley (2009)          | 100 |
| 72  | Kyndelose IX                   | Denmark           | Fibiger <i>et al.</i> (2013)     | 3   |
| 73  | L'Aumede                       | France            | Guilaine & Zammit (2001)         | 92  |
| 74  | La Fare                        | France            | Guilaine & Zammit (2001)         | 92  |
| 75  | La Ferme Duport                | France            | Guilaine & Zammit (2001)         | 92  |
| 76  | La Lave                        | France            | Guilaine & Zammit (2001)         | 92  |
| 77  | La Pierre Michelot             | France            | Guilaine & Zammit (2001)         | 92  |
| 78  | La Pierre Plate                | France            | Guilaine & Zammit (2001)         | 92  |
| 79  | La Tourasse                    | France            | Guilaine & Zammit (2001)         | 92  |
| 80  | Lanhill                        | England           | Smith (2013)                     | 4   |
| 81  | Las Yurdinas II                | Spain             | Fernández-Crespo (2017)          | 117 |
| 82  | Le Capitaine                   | France            | Guilaine & Zammit (2001)         | 92  |
| 83  | Le Castellet                   | France            | Guilaine & Zammit (2001)         | 92  |
| 84  | Le Chemin-de-Fer               | France            | Guilaine & Zammit (2001)         | 92  |
| 85  | Le Crespin                     | France            | Guilaine & Zammit (2001)         | 92  |
| 86  | Le Dehus                       | Guernsey          | Schulting <i>et al.</i> (2010)   | 118 |
| 87  | Le Monna                       | France            | Guilaine & Zammit (2001)         | 92  |
| 88  | Le Pas-de-Jouille              | France            | Guilaine & Zammit (2001)         | 92  |
| 89  | Le Sot-de-la -Lavogne          | France            | Guilaine & Zammit (2001)         | 92  |
| 90  | Les Baumes-Chaudes             | France            | Guilaine & Zammit (2001)         | 92  |
| 91  | Les Boileau                    | France            | Guilaine & Zammit (2001)         | 92  |
| 92  | Les Caires                     | France            | Guilaine & Zammit (2001)         | 92  |
| 93  | Les Cascades                   | France            | Guilaine & Zammit (2001)         | 92  |
| 94  | Les Châtelliers du Vieil-Auzay | France            | Guilaine & Zammit (2001)         | 92  |
| 95  | Les Cottés                     | France            | Guilaine & Zammit (2001)         | 92  |
| 96  | Les Gaches                     | France            | Guilaine & Zammit (2001)         | 92  |
| 97  | Les Treilles                   | France            | Guilaine & Zammit (2001)         | 92  |
| 98  | Lesser Kelco Cave              | England           | Leach (2008)                     | 119 |
| 100 | Littleton Drew                 | England           | Smith & Brickley (2009)          | 100 |
| 101 | Longar                         | Spain             | Marquez <i>et al.</i> (2005)     | 120 |
| 104 | Luttra                         | Sweden            | Fibiger <i>et al.</i> (2013)     | 3   |
| 106 | Maiden Castle                  | England           | Mercer (1999)                    | 46  |
| 107 | Mauray                         | France            | Guilaine & Zammit (2001)         | 92  |
| 108 | Maymac                         | France            | Guilaine & Zammit (2001)         | 92  |
| 109 | Millbarrow                     | England           | Schulting & Wysocki (2005)       | 23  |
| 110 | Neckargartach                  | Germany           | Fibiger (2009)                   | 96  |

|     |                                 |                     |                                 |     |
|-----|---------------------------------|---------------------|---------------------------------|-----|
| 111 | Niederbösa                      | Germany             | Fibiger (2009)                  | 96  |
| 112 | Norton Bavant                   | England             | Schulting & Wysocki (2005)      | 23  |
| 113 | Oleye                           | Belgium             | Lodewijckx (2009)               | 121 |
| 115 | Otzing                          | Germany             | Fibiger (2009)                  | 96  |
| 116 | Over Vindinge                   | Denmark             | Fibiger <i>et al.</i> (2013)    | 3   |
| 117 | Peña de Marañón                 | Spain               | Fernández-Crespo (2016)         | 122 |
| 118 | Penywyrlod                      | Wales               | Wysocki & Whittle (2000)        | 123 |
| 119 | Pontcharraud                    | France              | Guilaine & Zammit (2001)        | 92  |
| 120 | Porsmosen                       | Denmark             | Bennike (1985)                  | 103 |
| 122 | Poulnabrone                     | Ireland             | Schulting & Wysocki (2005)      | 23  |
| 123 | Preston Docks                   | England             | Schulting & Wysocki (2005)      | 23  |
| 124 | Previnquieres                   | France              | Guilaine & Zammit (2001)        | 92  |
| 125 | Puechcamp                       | France              | Guilaine & Zammit (2001)        | 92  |
| 126 | Quatzenheim                     | France              | Guilaine & Zammit (2001)        | 92  |
| 127 | Rævehøj                         | Denmark             | Fibiger <i>et al.</i> (2013)    | 3   |
| 128 | Razet                           | France              | Guilaine & Zammit (2001)        | 92  |
| 129 | Rec de Las Balmos               | France              | Guilaine & Zammit (2001)        | 92  |
| 130 | Rhos Ddigre                     | Wales               | Schulting (2012)                | 111 |
| 131 | Rochers de Freyr (Abri du Pape) | Belgium             | Polet & Dutour (2007)           | 124 |
| 132 | Rodmarton                       | England             | Smith & Brickley (2009)         | 100 |
| 133 | Salzmünde                       | Germany             | Meyer <i>et al.</i> (2013)      | 125 |
| 134 | Saint-Clair                     | France              | Guilaine & Zammit (2001)        | 92  |
| 135 | Saint-Enimie                    | France              | Guilaine & Zammit (2001)        | 92  |
| 138 | San Juan ante Portam Latinam    | Spain               | Vegas <i>et al.</i> (2012)      | 15  |
| 139 | San Quirce des Vallés           | Spain               | Armendariz <i>et al.</i> (1994) | 126 |
| 140 | Sargel, Saint-Rome de Cemon     | France              | Guilaine & Zammit (2001)        | 92  |
| 141 | Schipluiden                     | Netherlands         | Smits (2012)                    | 127 |
| 142 | Schöneck-Kilianstädten          | Germany             | Meyer <i>et al.</i> (2015)      | 21  |
| 143 | Schönstedt                      | Germany             | Fibiger (2009)                  | 96  |
| 144 | Sengkofen                       | Germany             | Fibiger <i>et al.</i> (2013)    | 3   |
| 145 | Sigersdal                       | Denmark             | Bennike (1985)                  | 103 |
| 146 | Skepparslöv                     | Sweden              | Fibiger <i>et al.</i> (2013)    | 3   |
| 148 | Sønderup III                    | Denmark             | Fibiger <i>et al.</i> (2013)    | 3   |
| 149 | Staines                         | England             | Schulting (2012)                | 111 |
| 150 | Steenstrupp                     | Denmark             | Fibiger <i>et al.</i> (2013)    | 3   |
| 151 | Stege                           | Denmark             | Fibiger <i>et al.</i> (2013)    | 3   |
| 152 | Stetten ob Lontal               | Germany             | Conard <i>et al.</i> (2004)     | 128 |
| 153 | Stuttgart-Mühlhausen            | Germany             | Fibiger (2009)                  | 96  |
| 154 | Sumburgh                        | Scotland (Shetland) | Walsh <i>et al.</i> (2011)      | 129 |
| 155 | Suquet-Coucolieres              | France              | Guilaine & Zammit (2001)        | 92  |
| 156 | Talheim                         | Germany             | Wahl & König (1987)             | 130 |
| 157 | Tangermünde                     | Germany             | Fibiger (2009)                  | 96  |
| 158 | Terrevaine, La Ciotat           | France              | Guilaine & Zammit (2001)        | 92  |
| 159 | Thornhill                       | Ireland             | Moore (2004)                    | 95  |
| 160 | Tiefbrunn                       | Germany             | Fibiger (2009)                  | 96  |
| 161 | Tinkinswood                     | Wales               | Schulting & Wysocki (2005)      | 23  |
| 162 | Trou Rosette                    | Belgium             | Polet <i>et al.</i> (1996)      | 131 |
| 163 | Tulloch of Assery               | Scotland            | Schulting & Wysocki (2005)      | 23  |
| 164 | Tumulus de Gendarme             | France              | Guilaine & Zammit (2001)        | 92  |
| 165 | Unstan                          | Scotland (Orkney)   | Ahlström & Molnar (2012)        | 51  |
| 166 | Västerbjers                     | Sweden              | Ahlström & Molnar (2012)        | 51  |
| 167 | Viby                            | Sweden              | Fibiger <i>et al.</i> (2013)    | 3   |
| 168 | Vikletice                       | Czech Republic      | Shbat <i>et al.</i> (2009)      | 132 |
| 169 | Visby                           | Sweden              | Ahlström & Molnar (2012)        | 51  |

|     |                          |         |                              |     |
|-----|--------------------------|---------|------------------------------|-----|
| 170 | Waiblingen               | Germany | Fibiger (2009)               | 96  |
| 171 | Warburg                  | Germany | Fibiger (2012)               | 19  |
| 172 | Waylands Smithy          | England | Whittle <i>et al.</i> (2007) | 133 |
| 173 | Weimar                   | Germany | Fibiger (2009)               | 96  |
| 174 | West Kennet              | England | Smith & Brickley (2009)      | 100 |
| 175 | West Tump                | England | Smith & Brickley (2009)      | 100 |
| 176 | Whitehawk Hill           | England | Schulting (2012)             | 111 |
| 177 | Winterbourne Monkton     | England | Schulting & Wysocki (2005)   | 23  |
| 178 | Wor Barrow               | England | Allen <i>et al.</i> (2016)   | 134 |
| 179 | Ihre                     | Sweden  | Ahlström & Molnar (2012)     | 51  |
| 180 | Alvastra                 | Sweden  | During & Nilsson (1991)      | 135 |
| 181 | Jettböle                 | Sweden  | Nunez (1995)                 | 136 |
| 182 | Östra Torp               | Sweden  | Fibiger <i>et al.</i> (2013) | 3   |
| 183 | Tygelsjö                 | Sweden  | Ahlström & Molnar (2012)     | 51  |
| 184 | Montfort-sur-Lizier      | France  | Guilaine & Zammit (2001)     | 92  |
| 185 | Fontbregoua Cave         | France  | Guilaine & Zammit (2001)     | 92  |
| 186 | La Cimitière des Anglais | France  | Guilaine & Zammit (2001)     | 92  |
| 187 | Suzoy                    | France  | Guilaine & Zammit (2001)     | 92  |
| 188 | Hypogeum II, Oyes        | France  | Guilaine & Zammit (2001)     | 92  |

### Additional References

90. M. J. Smith, *Picking up the Pieces: an Analysis of Cotswold Severn Funerary Practices via Re-examination of Human Skeletal Material from Selected Monuments*, PhD Thesis (University of Birmingham, UK, 2005).
91. M. Gligor, A. D. Soficaru, A. Fetcu, "Cranial fractures in 2005 early Eneolithic multiple burial From Alba Iulia-Lumea Nouă (Romania)" in *Archaeology of Women. Mortuary Practices and Bioarchaeological Reconstruction*, M. Gligor, A. Soficaru, Eds. (Editura Mega, 2018), pp. 27–76.
92. J. Guilaine, J. Zammit, *Le Sentier de la guerre. Visages de la violence préhistorique* (Seuil, 2001).
93. J. Petrasch, Mord und Krieg in der Bandkeramik. *Archäologisches Korrespondenzblatt* **29**, 505–516 (1999).
94. D. Benson, A. Whittle, *Building Memories: The Neolithic Cotswold Long Barrow at Ascott-Under-Wychwood* (Oxbow, 2006).
95. D. G. Moore, "Hostilities in early Ireland: Trouble with the new neighbours –the evidence from Ballyharry, County Antrim" in *From Sickles to Circles: Britain and Ireland at the Time of Stonehenge*, A. Gibson, A. Sheridan, Eds. (Tempus, 2004), pp. 142–154.
96. L. Fibiger, *Heading for Trouble: Skeletal Evidence for Interpersonal Violence in Neolithic Northwest Europe*, DPhil Thesis (University of Oxford, 2009).
97. W. van der Sanden, M. ter Schegget, "Frühe Gewalt in den Niederlanden. Der Mann aus dem Beilerstroom" in *Krieg – Eine archäologische Spurensuche*, H. Meller, M. Schefzik, Eds. (Theiss, 2015), pp. 145–147.
98. F. Chenal, B. Perrin, H. Barrand-Emam, B. Boulestin, A farewell to arms: A deposit of human limbs and bodies at Bergheim, France, c. 4000 BC. *Antiquity* **89**, 1313–1330 (2015).

99. A. Beyneix, "Neolithic violence in France: an overview" in *Sticks, Stones, and Broken Bones. Neolithic Violence in a European Perspective*, R. J. Schulting, L. Fibiger, Eds. (Oxford University Press, 2012), pp. 207–221.
100. M. Smith, M. Brickley (Eds.) *People of the Long Barrows: Life, Death and Burial in the Earlier Neolithic* (The History Press, 2009).
101. P. Bennike, K. Ebbesen, L.B. Jørgensen, Two Early Neolithic skeletons from Bolkilde bog, Denmark. *Antiquity* **60**, 199–209 (1986).
102. S. Jimenez-Brobeil, P. du Souich, I. Al Oumaoui, Possible relationship of cranial traumatic injuries with violence in the south-east Iberian Peninsula from the Neolithic to the Bronze Age. *Am. J. Phys. Anthropol.* **140**, 465–475 (2009).
103. P. Bennike, *Palaeopathology of Danish Skeletons* (Akademisk Forlag, 1985).
104. A. M. Gibson, A. R. Ogden, Duggleby Howe, Burial J and the Eastern Yorkshire Club Scene. *Yorkshire Archaeological Journal* **80**, 1–13 (2008).
105. K. W. Alt et al., A massacre of early Neolithic farmers in the high Pyrenees at Els Trocs, Spain. *Scientific Reports* **10**, 2131 (2020).
106. F. Pryor, A Neolithic multiple burial from Fengate, Peterborough. *Antiquity* **50**, 232–233 (1976).
107. G. Lidke, "Violence in the Single Grave culture of northern Germany?" in *Sticks, Stones, and Broken Bones. Neolithic Violence in a European Perspective*, R. J. Schulting, L. Fibiger, Eds. (Oxford University Press, 2012), pp. 139–150.
108. R. Mercer, F. Healy, *Hambledon Hill, Dorset, England* (English Heritage, 2008).
109. J. Wahl, B. Höhn, Eine Mehrfachbestattung der Michelsberger Kultur aus Heidelberg-Handschuhsheim, Rhein-Neckar-Kreis. *Fundberichte aus Baden-Württemberg* **13**, 123–198 (1988).
110. P. Pernter, P. Gostner, E. Egarter Vigl, F. J. Rühli, Radiologic proof for the Ice-man's cause of death (ca. 5,300 BP). *Journal of Archaeological Science* **34**, 1784–1786 (2007).
111. R. J. Schulting, "Skeletal evidence for interpersonal violence beyond mortuary monuments in southern Britain" in *Sticks, Stones, and Broken Bones. Neolithic Violence in a European Perspective*, R. J. Schulting, L. Fibiger, Eds. (Oxford University Press, 2012), pp. 223–248.
112. G. Retzius, *Crania Suecica Antiqua. Eine Darstellung der schwedischen Menschen-Schädel aus dem Steinzeitalter, dem Bronzezeitalter und dem Eisenzeitalter sowie ein Blick auf die Forschungen über die Rassencharaktere der europäischen Völker* (Aftonbladets Druckerei, 1900).
113. J. Orschiedt, A. Häußler, M. N. Haidle, K. W. Alt, C. H. Buitrago-Téllez, Survival of a multiple skull trauma: The case of an early Neolithic individual from the LBK enclosure at Herxheim (Southwest Germany). *Int. J. Osteoarchaeol.* **13**, 375–383 (2003).
114. R. J. Schulting, Claddedaethau mewn ogofâu: Prehistoric human remains (mainly) from the caves of Wales. *Proceedings of the University of Bristol Spelaeological Society* **28**, 185–219 (2020).
115. D. Lawrence, *Orkney's First Farmers. Reconstructing Biographies from Osteological Analysis to Gain Insights into Life and Society in a Neolithic Community on the Edge of Atlantic Europe*, PhD Thesis (University of Bradford, 2012).

116. L. Fibiger, "Osteoarchaeological analysis of human skeletal remains from 23 Irish caves" in *Underground Archaeology. Studies on Human Bones and Artefacts from Ireland's Caves*, M. A. Dowd, Ed. (Oxbow Books, 2016), pp. 3–37.
117. T. Fernández-Crespo, New evidence of Early Chalcolithic interpersonal violence in the Middle Ebro Valley (Spain): two arrowhead injuries from the swallet of Las Yurdinas II. *Int. J. Osteoarchaeol.* **27**, 76–85 (2017).
118. R. J. Schulting, H. Sebire, J. E. Robb, On the road to Paradise: new insights from AMS dates and stable isotopes at Le Déhus, Guernsey, and the Channel Islands Middle Neolithic. *Oxford Journal of Archaeology* **29**, 149–173 (2010).
119. S. Leach, "Odd one out? Earlier Neolithic deposition of human remains in caves and rock shelters in the Yorkshire Dales" in *Deviant Burial in the Archaeological Record*, E. Murphy, Ed. (Oxbow, 2008), pp. 35–56.
120. B. Marquez et al., "Projectile points as signs of violence in collective burials during the 4th and the 3rd millennia cal. BC in the north-east of the Iberian peninsula" in *Prehistoric Technology: 40 Years Later*, L. Longo, N. Skakun, Eds. (Archaeopress, 2005), pp. 321–325.
121. M. Lodewijckx, "Frontier settlements of the LBK in central Belgium" in *Creating Communities. New Advances in Central European Neolithic Research*, D. Hofmann, P. Bickle, Eds. (Oxbow, 2009), pp. 32–49.
122. T. Fernández-Crespo, An arrowhead injury in a Late Neolithic/Early Chalcolithic human cuneiform from the rockshelter of La Peña de Marañón (Navarre, Spain). *Int. J. Osteoarchaeol.* **26**, 1024–1033 (2016).
123. M. Wysocki, A. Whittle, Diversity, lifestyles and rites: New biological and archaeological evidence from British Earlier Neolithic mortuary assemblages. *Antiquity* **74**, 591–601 (2000).
124. C. Polet, O. Dutour, Étude paléopathologique des squelettes de l'abri des Autours (Province de Namur, Belgique). *Anthropologica et Praehistorica* **118**, 127–160 (2007).
125. C. Meyer et al., "Eine komplexe Mehrfachbestattung der Salzmünder Kultur" in *3300 BC. Mysteriöse Steinzeittote und ihre Welt*, H. Meller, Ed. (Nünnerich-Asmus, 2013), pp. 290–299.
126. J. Armendariz, S. Irigarai, F. Etxeberria, New Evidence of Prehistoric Arrow Wounds in the Iberian Peninsula. *Int. J. Osteoarchaeol.* **4**, 215–222 (1994).
127. E. Smits, "Interpersonal violence in the Late Mesolithic and Middle Neolithic in the Netherlands" in *Sticks, Stones, and Broken Bones. Neolithic Violence in a European Perspective*, R. J. Schulting, L. Fibiger, Eds. (Oxford University Press, 2012), pp. 191–206.
128. N. J. Conard, P. M. Grootes, F. H. Smith, Unexpectedly recent dates for human remains from Vogelherd. *Nature* **430**, 198–201 (2004).
129. S. Walsh, C. Knüsel, N. Melton, A re-appraisal of the Early Neolithic human remains excavated at Sumburgh, Shetland, in 1977. *Proceedings of the Society of Antiquaries of Scotland* **141**, 3–17 (2011).
130. J. Wahl, H. G. König, Anthropologisch-traumatologische Untersuchung der menschlichen Skelettreste aus dem bandkeramischen Massengrab bei Talheim, Kreis Heilbronn. *Fundberichte aus Baden-Württemberg* **12**, 65–193 (1987).

131. C. Polet, O. Dutour, R. Orban, I. Jadin, S. Louryan, A healed wound caused by a flint Arrowhead in a Neolithic human innominate from the Trou Rosette (Furfooz, Belgium). *Int. J. Osteoarchaeol.* **6**, 414–420 (1996).
132. A. Shbat, I. Růžičková, P. Herlová, Skeletal health of Late Neolithic populations from Bohemia. *Anthropologie* **47**, 195–214 (2009).
133. A. Whittle, A. Bayliss, M. Wysocki, Once in a lifetime: the date of the Waylands Smithy long barrow. *Cambridge Archaeological Journal* **17**(S1), 103–121 (2007).
134. M. J. Allen et al., Wor Barrow, *Cranborne Chase, Dorset. Chronological Modelling* (Historic England, 2016).
135. E. M. Doring, L. Nilsson, Mechanical surface analysis of bone: a case study of cut marks and enamel hypoplasia on a Neolithic cranium from Sweden. *Am. J. Phys. Anthropol.* **84**, 113–125 (1991).
136. M. Nunez, Cannibalism on Pitted Ware Åland? *Karhunhammas* **16**, 61–68 (1995).
